# Supplementary material
Source: publisher figshare collection journal article supplement (https://springernature.figshare.com/ndownloader/files/7197464)
Supplement: Supplementary file 1 [file 7197464]

## Sheet: Hoja1
Date	aa index (nT)	Moon luminosity
1868-01-01	8	0.29
1868-01-02	4	0.38
1868-01-03	3	0.48
1868-01-04	3	0.59
1868-01-05	9	0.69
1868-01-06	14	0.79
1868-01-07	7	0.87
1868-01-08	9	0.94
1868-01-09	7	0.98
1868-01-10	3	1
1868-01-11	11	0.98
1868-01-12	10	0.94
1868-01-13	13	0.87
1868-01-14	6	0.78
1868-01-15	7	0.68
1868-01-16	16	0.58
1868-01-17	11	0.47
1868-01-18	14	0.37
1868-01-19	5	0.28
1868-01-20	10	0.2
1868-01-21	11	0.13
1868-01-22	12	0.07
1868-01-23	22	0.03
1868-01-24	31	0.01
1868-01-25	25	0
1868-01-26	12	0.01
1868-01-27	16	0.04
1868-01-28	12	0.09
1868-01-29	8	0.15
1868-01-30	5	0.23
1868-01-31	5	0.32
1868-02-01	7	0.42
1868-02-02	11	0.53
1868-02-03	21	0.64
1868-02-04	10	0.74
1868-02-05	23	0.84
1868-02-06	34	0.91
1868-02-07	15	0.97
1868-02-08	34	1
1868-02-09	23	0.99
1868-02-10	13	0.96
1868-02-11	7	0.91
1868-02-12	7	0.83
1868-02-13	7	0.74
1868-02-14	8	0.64
1868-02-15	2	0.54
1868-02-16	9	0.44
1868-02-17	10	0.35
1868-02-18	6	0.26
1868-02-19	15	0.18
1868-02-20	36	0.11
1868-02-21	24	0.06
1868-02-22	23	0.02
1868-02-23	22	0
1868-02-24	15	0
1868-02-25	36	0.02
1868-02-26	17	0.06
1868-02-27	9	0.11
1868-02-28	14	0.18
1868-02-29	10	0.27
1868-03-01	16	0.37
1868-03-02	5	0.48
1868-03-03	11	0.59
1868-03-04	10	0.7
1868-03-05	41	0.8
1868-03-06	26	0.89
1868-03-07	17	0.95
1868-03-08	10	0.99
1868-03-09	8	1
1868-03-10	9	0.98
1868-03-11	13	0.94
1868-03-12	7	0.87
1868-03-13	5	0.8
1868-03-14	3	0.71
1868-03-15	8	0.61
1868-03-16	7	0.52
1868-03-17	16	0.42
1868-03-18	8	0.33
1868-03-19	20	0.24
1868-03-20	59	0.17
1868-03-21	48	0.1
1868-03-22	31	0.05
1868-03-23	50	0.02
1868-03-24	48	0
1868-03-25	46	0.01
1868-03-26	17	0.03
1868-03-27	13	0.08
1868-03-28	7	0.15
1868-03-29	5	0.23
1868-03-30	27	0.33
1868-03-31	22	0.44
1868-04-01	33	0.56
1868-04-02	73	0.67
1868-04-03	19	0.77
1868-04-04	12	0.86
1868-04-05	6	0.93
1868-04-06	4	0.98
1868-04-07	4	1
1868-04-08	10	0.99
1868-04-09	5	0.96
1868-04-10	13	0.91
1868-04-11	9	0.85
1868-04-12	7	0.77
1868-04-13	15	0.68
1868-04-14	28	0.59
1868-04-15	32	0.5
1868-04-16	30	0.4
1868-04-17	13	0.31
1868-04-18	22	0.23
1868-04-19	55	0.15
1868-04-20	31	0.09
1868-04-21	22	0.04
1868-04-22	14	0.01
1868-04-23	14	0
1868-04-24	9	0.02
1868-04-25	11	0.06
1868-04-26	9	0.12
1868-04-27	45	0.2
1868-04-28	23	0.3
1868-04-29	29	0.41
1868-04-30	34	0.53
1868-05-01	17	0.64
1868-05-02	6	0.75
1868-05-03	5	0.84
1868-05-04	6	0.91
1868-05-05	5	0.96
1868-05-06	5	0.99
1868-05-07	6	1
1868-05-08	8	0.98
1868-05-09	4	0.95
1868-05-10	27	0.89
1868-05-11	36	0.83
1868-05-12	27	0.75
1868-05-13	19	0.66
1868-05-14	9	0.57
1868-05-15	11	0.47
1868-05-16	7	0.38
1868-05-17	5	0.29
1868-05-18	2	0.2
1868-05-19	9	0.13
1868-05-20	60	0.07
1868-05-21	14	0.02
1868-05-22	8	0
1868-05-23	12	0.01
1868-05-24	56	0.04
1868-05-25	7	0.1
1868-05-26	14	0.18
1868-05-27	45	0.28
1868-05-28	27	0.39
1868-05-29	28	0.5
1868-05-30	17	0.61
1868-05-31	7	0.72
1868-06-01	6	0.81
1868-06-02	19	0.89
1868-06-03	23	0.94
1868-06-04	7	0.98
1868-06-05	16	1
1868-06-06	13	0.99
1868-06-07	21	0.97
1868-06-08	51	0.93
1868-06-09	7	0.87
1868-06-10	16	0.8
1868-06-11	26	0.72
1868-06-12	7	0.64
1868-06-13	12	0.54
1868-06-14	21	0.45
1868-06-15	20	0.35
1868-06-16	20	0.25
1868-06-17	21	0.17
1868-06-18	12	0.09
1868-06-19	27	0.04
1868-06-20	22	0.01
1868-06-21	23	0
1868-06-22	11	0.03
1868-06-23	10	0.08
1868-06-24	19	0.16
1868-06-25	14	0.26
1868-06-26	22	0.36
1868-06-27	17	0.47
1868-06-28	14	0.58
1868-06-29	13	0.69
1868-06-30	32	0.78
1868-07-01	14	0.86
1868-07-02	10	0.92
1868-07-03	10	0.97
1868-07-04	27	0.99
1868-07-05	18	1
1868-07-06	18	0.99
1868-07-07	10	0.96
1868-07-08	18	0.91
1868-07-09	37	0.85
1868-07-10	28	0.78
1868-07-11	43	0.7
1868-07-12	18	0.6
1868-07-13	11	0.5
1868-07-14	21	0.4
1868-07-15	70	0.3
1868-07-16	18	0.21
1868-07-17	30	0.12
1868-07-18	13	0.06
1868-07-19	29	0.01
1868-07-20	29	0
1868-07-21	17	0.02
1868-07-22	11	0.07
1868-07-23	25	0.14
1868-07-24	11	0.23
1868-07-25	16	0.33
1868-07-26	20	0.44
1868-07-27	22	0.55
1868-07-28	23	0.65
1868-07-29	19	0.74
1868-07-30	11	0.82
1868-07-31	18	0.89
1868-08-01	8	0.94
1868-08-02	6	0.98
1868-08-03	3	1
1868-08-04	22	1
1868-08-05	19	0.98
1868-08-06	12	0.94
1868-08-07	8	0.89
1868-08-08	10	0.83
1868-08-09	25	0.75
1868-08-10	49	0.66
1868-08-11	28	0.56
1868-08-12	28	0.45
1868-08-13	17	0.34
1868-08-14	18	0.24
1868-08-15	32	0.15
1868-08-16	8	0.07
1868-08-17	4	0.02
1868-08-18	4	0
1868-08-19	16	0.01
1868-08-20	34	0.05
1868-08-21	13	0.11
1868-08-22	15	0.2
1868-08-23	5	0.29
1868-08-24	9	0.39
1868-08-25	14	0.5
1868-08-26	11	0.6
1868-08-27	17	0.69
1868-08-28	19	0.78
1868-08-29	12	0.85
1868-08-30	71	0.91
1868-08-31	66	0.96
1868-09-01	29	0.99
1868-09-02	21	1
1868-09-03	10	0.99
1868-09-04	6	0.97
1868-09-05	25	0.93
1868-09-06	45	0.87
1868-09-07	19	0.79
1868-09-08	20	0.7
1868-09-09	14	0.6
1868-09-10	7	0.49
1868-09-11	12	0.38
1868-09-12	10	0.27
1868-09-13	9	0.18
1868-09-14	5	0.09
1868-09-15	39	0.04
1868-09-16	64	0
1868-09-17	5	0
1868-09-18	6	0.03
1868-09-19	33	0.08
1868-09-20	28	0.16
1868-09-21	36	0.24
1868-09-22	34	0.34
1868-09-23	17	0.44
1868-09-24	7	0.54
1868-09-25	9	0.63
1868-09-26	44	0.72
1868-09-27	49	0.8
1868-09-28	53	0.87
1868-09-29	30	0.93
1868-09-30	36	0.97
1868-10-01	74	0.99
1868-10-02	11	1
1868-10-03	20	0.99
1868-10-04	8	0.95
1868-10-05	9	0.9
1868-10-06	20	0.83
1868-10-07	27	0.74
1868-10-08	22	0.64
1868-10-09	16	0.53
1868-10-10	6	0.42
1868-10-11	13	0.31
1868-10-12	6	0.21
1868-10-13	4	0.12
1868-10-14	10	0.05
1868-10-15	8	0.01
1868-10-16	9	0
1868-10-17	14	0.02
1868-10-18	15	0.06
1868-10-19	47	0.11
1868-10-20	30	0.19
1868-10-21	23	0.28
1868-10-22	53	0.37
1868-10-23	70	0.46
1868-10-24	70	0.56
1868-10-25	67	0.65
1868-10-26	44	0.74
1868-10-27	31	0.82
1868-10-28	25	0.88
1868-10-29	13	0.94
1868-10-30	29	0.98
1868-10-31	11	1
1868-11-01	11	0.99
1868-11-02	8	0.97
1868-11-03	4	0.93
1868-11-04	10	0.86
1868-11-05	11	0.78
1868-11-06	9	0.68
1868-11-07	2	0.57
1868-11-08	12	0.45
1868-11-09	16	0.34
1868-11-10	8	0.24
1868-11-11	4	0.15
1868-11-12	4	0.08
1868-11-13	2	0.03
1868-11-14	5	0
1868-11-15	19	0.01
1868-11-16	16	0.03
1868-11-17	10	0.07
1868-11-18	11	0.13
1868-11-19	53	0.21
1868-11-20	37	0.29
1868-11-21	24	0.38
1868-11-22	21	0.47
1868-11-23	24	0.57
1868-11-24	26	0.66
1868-11-25	15	0.75
1868-11-26	15	0.83
1868-11-27	6	0.9
1868-11-28	9	0.95
1868-11-29	5	0.99
1868-11-30	8	1
1868-12-01	10	0.99
1868-12-02	7	0.95
1868-12-03	3	0.89
1868-12-04	5	0.81
1868-12-05	20	0.71
1868-12-06	12	0.6
1868-12-07	22	0.49
1868-12-08	12	0.38
1868-12-09	9	0.27
1868-12-10	7	0.18
1868-12-11	15	0.11
1868-12-12	10	0.05
1868-12-13	49	0.01
1868-12-14	31	0
1868-12-15	16	0.01
1868-12-16	6	0.04
1868-12-17	16	0.08
1868-12-18	25	0.15
1868-12-19	15	0.22
1868-12-20	18	0.3
1868-12-21	14	0.39
1868-12-22	4	0.48
1868-12-23	13	0.58
1868-12-24	9	0.67
1868-12-25	8	0.76
1868-12-26	11	0.85
1868-12-27	11	0.91
1868-12-28	16	0.97
1868-12-29	8	0.99
1868-12-30	17	1
1868-12-31	8	0.97
1869-01-01	16	0.92
1869-01-02	25	0.84
1869-01-03	13	0.75
1869-01-04	16	0.64
1869-01-05	14	0.53
1869-01-06	18	0.42
1869-01-07	28	0.32
1869-01-08	24	0.22
1869-01-09	10	0.14
1869-01-10	25	0.08
1869-01-11	13	0.03
1869-01-12	23	0.01
1869-01-13	19	0
1869-01-14	6	0.01
1869-01-15	8	0.04
1869-01-16	11	0.09
1869-01-17	21	0.15
1869-01-18	17	0.23
1869-01-19	12	0.31
1869-01-20	43	0.4
1869-01-21	69	0.5
1869-01-22	13	0.6
1869-01-23	4	0.7
1869-01-24	15	0.79
1869-01-25	20	0.87
1869-01-26	26	0.94
1869-01-27	29	0.98
1869-01-28	25	1
1869-01-29	5	0.99
1869-01-30	14	0.94
1869-01-31	16	0.88
1869-02-01	10	0.79
1869-02-02	14	0.69
1869-02-03	96	0.58
1869-02-04	58	0.47
1869-02-05	28	0.37
1869-02-06	21	0.27
1869-02-07	25	0.18
1869-02-08	21	0.11
1869-02-09	34	0.06
1869-02-10	33	0.02
1869-02-11	29	0
1869-02-12	22	0
1869-02-13	18	0.02
1869-02-14	11	0.05
1869-02-15	11	0.1
1869-02-16	18	0.17
1869-02-17	12	0.24
1869-02-18	12	0.33
1869-02-19	25	0.43
1869-02-20	18	0.53
1869-02-21	10	0.64
1869-02-22	23	0.74
1869-02-23	30	0.83
1869-02-24	31	0.91
1869-02-25	28	0.97
1869-02-26	15	1
1869-02-27	7	1
1869-02-28	3	0.97
1869-03-01	7	0.91
1869-03-02	31	0.83
1869-03-03	59	0.73
1869-03-04	25	0.63
1869-03-05	14	0.53
1869-03-06	13	0.42
1869-03-07	26	0.33
1869-03-08	18	0.24
1869-03-09	41	0.16
1869-03-10	52	0.1
1869-03-11	28	0.05
1869-03-12	26	0.02
1869-03-13	29	0
1869-03-14	23	0
1869-03-15	19	0.03
1869-03-16	9	0.06
1869-03-17	10	0.12
1869-03-18	59	0.19
1869-03-19	11	0.28
1869-03-20	16	0.37
1869-03-21	11	0.47
1869-03-22	7	0.58
1869-03-23	6	0.69
1869-03-24	5	0.79
1869-03-25	10	0.88
1869-03-26	21	0.95
1869-03-27	23	0.99
1869-03-28	25	1
1869-03-29	33	0.98
1869-03-30	15	0.93
1869-03-31	22	0.87
1869-04-01	32	0.78
1869-04-02	42	0.69
1869-04-03	44	0.59
1869-04-04	31	0.49
1869-04-05	34	0.39
1869-04-06	38	0.3
1869-04-07	25	0.22
1869-04-08	50	0.14
1869-04-09	38	0.09
1869-04-10	31	0.04
1869-04-11	25	0.01
1869-04-12	26	0
1869-04-13	27	0.01
1869-04-14	16	0.04
1869-04-15	134	0.08
1869-04-16	87	0.15
1869-04-17	37	0.23
1869-04-18	6	0.33
1869-04-19	12	0.43
1869-04-20	10	0.54
1869-04-21	13	0.65
1869-04-22	17	0.76
1869-04-23	17	0.85
1869-04-24	8	0.93
1869-04-25	6	0.98
1869-04-26	20	1
1869-04-27	28	0.99
1869-04-28	8	0.96
1869-04-29	13	0.9
1869-04-30	12	0.83
1869-05-01	8	0.74
1869-05-02	4	0.65
1869-05-03	4	0.56
1869-05-04	34	0.46
1869-05-05	58	0.37
1869-05-06	27	0.28
1869-05-07	15	0.2
1869-05-08	35	0.13
1869-05-09	32	0.07
1869-05-10	25	0.03
1869-05-11	50	0.01
1869-05-12	7	0
1869-05-13	157	0.02
1869-05-14	38	0.06
1869-05-15	22	0.12
1869-05-16	32	0.2
1869-05-17	4	0.29
1869-05-18	20	0.4
1869-05-19	9	0.51
1869-05-20	7	0.63
1869-05-21	6	0.73
1869-05-22	3	0.83
1869-05-23	6	0.91
1869-05-24	25	0.96
1869-05-25	5	0.99
1869-05-26	9	1
1869-05-27	6	0.98
1869-05-28	17	0.93
1869-05-29	9	0.87
1869-05-30	12	0.8
1869-05-31	33	0.72
1869-06-01	7	0.62
1869-06-02	16	0.53
1869-06-03	26	0.44
1869-06-04	18	0.34
1869-06-05	15	0.26
1869-06-06	14	0.18
1869-06-07	76	0.11
1869-06-08	6	0.05
1869-06-09	12	0.02
1869-06-10	10	0
1869-06-11	15	0.01
1869-06-12	25	0.04
1869-06-13	27	0.1
1869-06-14	20	0.17
1869-06-15	12	0.27
1869-06-16	19	0.38
1869-06-17	21	0.49
1869-06-18	8	0.6
1869-06-19	15	0.71
1869-06-20	18	0.81
1869-06-21	16	0.89
1869-06-22	11	0.95
1869-06-23	8	0.99
1869-06-24	26	1
1869-06-25	29	0.99
1869-06-26	13	0.96
1869-06-27	6	0.91
1869-06-28	12	0.85
1869-06-29	19	0.77
1869-06-30	56	0.69
1869-07-01	22	0.6
1869-07-02	18	0.5
1869-07-03	19	0.41
1869-07-04	37	0.32
1869-07-05	16	0.23
1869-07-06	12	0.15
1869-07-07	10	0.08
1869-07-08	12	0.03
1869-07-09	21	0
1869-07-10	19	0
1869-07-11	16	0.03
1869-07-12	10	0.08
1869-07-13	6	0.15
1869-07-14	12	0.25
1869-07-15	6	0.36
1869-07-16	16	0.47
1869-07-17	33	0.58
1869-07-18	43	0.69
1869-07-19	48	0.79
1869-07-20	25	0.87
1869-07-21	10	0.93
1869-07-22	17	0.97
1869-07-23	14	1
1869-07-24	5	1
1869-07-25	13	0.98
1869-07-26	25	0.94
1869-07-27	9	0.89
1869-07-28	9	0.83
1869-07-29	5	0.75
1869-07-30	16	0.66
1869-07-31	16	0.57
1869-08-01	16	0.47
1869-08-02	9	0.37
1869-08-03	20	0.28
1869-08-04	12	0.19
1869-08-05	17	0.11
1869-08-06	47	0.05
1869-08-07	43	0.01
1869-08-08	24	0
1869-08-09	33	0.02
1869-08-10	29	0.06
1869-08-11	12	0.13
1869-08-12	5	0.23
1869-08-13	3	0.33
1869-08-14	3	0.44
1869-08-15	10	0.55
1869-08-16	41	0.66
1869-08-17	32	0.76
1869-08-18	14	0.84
1869-08-19	9	0.91
1869-08-20	59	0.96
1869-08-21	16	0.99
1869-08-22	7	1
1869-08-23	7	0.99
1869-08-24	43	0.97
1869-08-25	30	0.93
1869-08-26	11	0.87
1869-08-27	11	0.8
1869-08-28	36	0.72
1869-08-29	8	0.63
1869-08-30	4	0.53
1869-08-31	5	0.43
1869-09-01	22	0.33
1869-09-02	54	0.23
1869-09-03	48	0.15
1869-09-04	67	0.07
1869-09-05	32	0.02
1869-09-06	27	0
1869-09-07	3	0.01
1869-09-08	6	0.05
1869-09-09	16	0.11
1869-09-10	37	0.2
1869-09-11	39	0.3
1869-09-12	17	0.41
1869-09-13	11	0.51
1869-09-14	82	0.62
1869-09-15	31	0.71
1869-09-16	31	0.8
1869-09-17	18	0.87
1869-09-18	13	0.93
1869-09-19	6	0.97
1869-09-20	7	0.99
1869-09-21	6	1
1869-09-22	26	0.99
1869-09-23	16	0.96
1869-09-24	6	0.91
1869-09-25	20	0.85
1869-09-26	29	0.78
1869-09-27	42	0.69
1869-09-28	76	0.59
1869-09-29	88	0.49
1869-09-30	18	0.38
1869-10-01	17	0.28
1869-10-02	23	0.18
1869-10-03	36	0.1
1869-10-04	19	0.04
1869-10-05	16	0.01
1869-10-06	49	0
1869-10-07	22	0.03
1869-10-08	5	0.09
1869-10-09	4	0.16
1869-10-10	9	0.26
1869-10-11	7	0.36
1869-10-12	6	0.46
1869-10-13	10	0.56
1869-10-14	10	0.66
1869-10-15	10	0.74
1869-10-16	4	0.82
1869-10-17	6	0.89
1869-10-18	3	0.94
1869-10-19	12	0.98
1869-10-20	14	1
1869-10-21	13	1
1869-10-22	15	0.98
1869-10-23	40	0.94
1869-10-24	16	0.89
1869-10-25	41	0.82
1869-10-26	33	0.74
1869-10-27	19	0.64
1869-10-28	30	0.54
1869-10-29	24	0.43
1869-10-30	12	0.32
1869-10-31	31	0.22
1869-11-01	14	0.13
1869-11-02	25	0.06
1869-11-03	15	0.02
1869-11-04	12	0
1869-11-05	6	0.02
1869-11-06	6	0.06
1869-11-07	12	0.12
1869-11-08	20	0.2
1869-11-09	44	0.29
1869-11-10	31	0.39
1869-11-11	14	0.49
1869-11-12	20	0.59
1869-11-13	7	0.68
1869-11-14	6	0.76
1869-11-15	9	0.84
1869-11-16	6	0.9
1869-11-17	20	0.95
1869-11-18	16	0.98
1869-11-19	4	1
1869-11-20	3	0.99
1869-11-21	10	0.97
1869-11-22	28	0.93
1869-11-23	19	0.86
1869-11-24	9	0.79
1869-11-25	28	0.69
1869-11-26	16	0.59
1869-11-27	6	0.47
1869-11-28	9	0.36
1869-11-29	9	0.26
1869-11-30	19	0.16
1869-12-01	9	0.08
1869-12-02	15	0.03
1869-12-03	19	0
1869-12-04	25	0
1869-12-05	33	0.03
1869-12-06	32	0.08
1869-12-07	9	0.15
1869-12-08	12	0.23
1869-12-09	7	0.32
1869-12-10	21	0.41
1869-12-11	52	0.5
1869-12-12	22	0.6
1869-12-13	10	0.69
1869-12-14	47	0.77
1869-12-15	32	0.85
1869-12-16	11	0.91
1869-12-17	9	0.96
1869-12-18	5	0.99
1869-12-19	7	1
1869-12-20	6	0.99
1869-12-21	5	0.96
1869-12-22	9	0.9
1869-12-23	4	0.82
1869-12-24	3	0.73
1869-12-25	4	0.63
1869-12-26	6	0.51
1869-12-27	18	0.4
1869-12-28	8	0.29
1869-12-29	9	0.19
1869-12-30	5	0.11
1869-12-31	4	0.05
1870-01-01	39	0.01
1870-01-02	31	0
1870-01-03	118	0.01
1870-01-04	52	0.04
1870-01-05	29	0.1
1870-01-06	16	0.16
1870-01-07	18	0.24
1870-01-08	28	0.33
1870-01-09	30	0.42
1870-01-10	15	0.51
1870-01-11	12	0.61
1870-01-12	6	0.7
1870-01-13	6	0.78
1870-01-14	8	0.86
1870-01-15	4	0.92
1870-01-16	5	0.97
1870-01-17	6	1
1870-01-18	4	1
1870-01-19	6	0.98
1870-01-20	5	0.93
1870-01-21	14	0.86
1870-01-22	24	0.77
1870-01-23	20	0.66
1870-01-24	14	0.55
1870-01-25	6	0.44
1870-01-26	17	0.33
1870-01-27	38	0.23
1870-01-28	19	0.14
1870-01-29	34	0.08
1870-01-30	29	0.03
1870-01-31	19	0
1870-02-01	89	0
1870-02-02	26	0.02
1870-02-03	18	0.06
1870-02-04	23	0.11
1870-02-05	17	0.17
1870-02-06	26	0.25
1870-02-07	23	0.34
1870-02-08	3	0.43
1870-02-09	30	0.52
1870-02-10	22	0.62
1870-02-11	41	0.71
1870-02-12	96	0.8
1870-02-13	18	0.88
1870-02-14	18	0.94
1870-02-15	13	0.98
1870-02-16	11	1
1870-02-17	12	0.99
1870-02-18	7	0.95
1870-02-19	13	0.89
1870-02-20	17	0.8
1870-02-21	13	0.7
1870-02-22	19	0.59
1870-02-23	29	0.48
1870-02-24	26	0.37
1870-02-25	6	0.27
1870-02-26	7	0.18
1870-02-27	14	0.11
1870-02-28	13	0.05
1870-03-01	11	0.02
1870-03-02	15	0
1870-03-03	10	0.01
1870-03-04	10	0.03
1870-03-05	15	0.07
1870-03-06	20	0.12
1870-03-07	19	0.19
1870-03-08	32	0.26
1870-03-09	25	0.35
1870-03-10	18	0.45
1870-03-11	11	0.55
1870-03-12	28	0.65
1870-03-13	31	0.74
1870-03-14	26	0.83
1870-03-15	17	0.91
1870-03-16	12	0.96
1870-03-17	10	0.99
1870-03-18	15	1
1870-03-19	9	0.97
1870-03-20	21	0.91
1870-03-21	23	0.83
1870-03-22	79	0.74
1870-03-23	16	0.63
1870-03-24	27	0.52
1870-03-25	16	0.42
1870-03-26	23	0.32
1870-03-27	11	0.23
1870-03-28	31	0.15
1870-03-29	20	0.09
1870-03-30	24	0.04
1870-03-31	34	0.01
1870-04-01	14	0
1870-04-02	21	0.01
1870-04-03	27	0.03
1870-04-04	9	0.08
1870-04-05	106	0.13
1870-04-06	22	0.21
1870-04-07	30	0.29
1870-04-08	19	0.38
1870-04-09	21	0.48
1870-04-10	37	0.59
1870-04-11	8	0.69
1870-04-12	24	0.79
1870-04-13	31	0.87
1870-04-14	31	0.94
1870-04-15	16	0.98
1870-04-16	50	1
1870-04-17	24	0.98
1870-04-18	39	0.93
1870-04-19	23	0.86
1870-04-20	17	0.78
1870-04-21	29	0.68
1870-04-22	21	0.57
1870-04-23	10	0.47
1870-04-24	24	0.37
1870-04-25	23	0.28
1870-04-26	30	0.19
1870-04-27	10	0.13
1870-04-28	37	0.07
1870-04-29	13	0.03
1870-04-30	10	0.01
1870-05-01	6	0
1870-05-02	21	0.02
1870-05-03	23	0.05
1870-05-04	22	0.09
1870-05-05	18	0.16
1870-05-06	14	0.24
1870-05-07	19	0.33
1870-05-08	12	0.43
1870-05-09	12	0.54
1870-05-10	9	0.65
1870-05-11	7	0.75
1870-05-12	3	0.85
1870-05-13	3	0.92
1870-05-14	9	0.97
1870-05-15	56	1
1870-05-16	34	0.99
1870-05-17	11	0.96
1870-05-18	17	0.9
1870-05-19	16	0.82
1870-05-20	107	0.73
1870-05-21	27	0.63
1870-05-22	23	0.53
1870-05-23	24	0.43
1870-05-24	15	0.33
1870-05-25	13	0.25
1870-05-26	15	0.17
1870-05-27	18	0.11
1870-05-28	42	0.06
1870-05-29	14	0.02
1870-05-30	18	0
1870-05-31	22	0
1870-06-01	18	0.02
1870-06-02	5	0.06
1870-06-03	12	0.12
1870-06-04	17	0.2
1870-06-05	12	0.29
1870-06-06	8	0.39
1870-06-07	10	0.5
1870-06-08	8	0.62
1870-06-09	13	0.73
1870-06-10	9	0.82
1870-06-11	4	0.91
1870-06-12	40	0.96
1870-06-13	41	0.99
1870-06-14	18	1
1870-06-15	28	0.97
1870-06-16	26	0.92
1870-06-17	49	0.86
1870-06-18	21	0.77
1870-06-19	27	0.68
1870-06-20	18	0.59
1870-06-21	17	0.49
1870-06-22	5	0.4
1870-06-23	4	0.31
1870-06-24	3	0.22
1870-06-25	18	0.15
1870-06-26	13	0.09
1870-06-27	14	0.04
1870-06-28	15	0.01
1870-06-29	15	0
1870-06-30	7	0.01
1870-07-01	7	0.04
1870-07-02	10	0.1
1870-07-03	12	0.17
1870-07-04	15	0.26
1870-07-05	25	0.37
1870-07-06	28	0.48
1870-07-07	22	0.59
1870-07-08	16	0.71
1870-07-09	10	0.81
1870-07-10	23	0.89
1870-07-11	18	0.95
1870-07-12	6	0.99
1870-07-13	19	1
1870-07-14	20	0.99
1870-07-15	6	0.95
1870-07-16	4	0.89
1870-07-17	11	0.82
1870-07-18	10	0.74
1870-07-19	21	0.65
1870-07-20	7	0.56
1870-07-21	4	0.46
1870-07-22	3	0.37
1870-07-23	8	0.28
1870-07-24	13	0.2
1870-07-25	20	0.13
1870-07-26	16	0.07
1870-07-27	4	0.02
1870-07-28	40	0
1870-07-29	7	0
1870-07-30	18	0.03
1870-07-31	18	0.08
1870-08-01	14	0.15
1870-08-02	14	0.24
1870-08-03	33	0.35
1870-08-04	8	0.46
1870-08-05	18	0.57
1870-08-06	22	0.68
1870-08-07	18	0.78
1870-08-08	7	0.87
1870-08-09	13	0.93
1870-08-10	8	0.98
1870-08-11	8	1
1870-08-12	8	1
1870-08-13	6	0.97
1870-08-14	3	0.93
1870-08-15	6	0.87
1870-08-16	14	0.8
1870-08-17	13	0.71
1870-08-18	17	0.63
1870-08-19	25	0.53
1870-08-20	75	0.44
1870-08-21	70	0.34
1870-08-22	37	0.25
1870-08-23	33	0.17
1870-08-24	15	0.1
1870-08-25	33	0.04
1870-08-26	25	0.01
1870-08-27	23	0
1870-08-28	38	0.02
1870-08-29	24	0.06
1870-08-30	22	0.13
1870-08-31	14	0.22
1870-09-01	11	0.32
1870-09-02	11	0.43
1870-09-03	53	0.55
1870-09-04	57	0.66
1870-09-05	37	0.76
1870-09-06	17	0.84
1870-09-07	70	0.91
1870-09-08	22	0.96
1870-09-09	15	0.99
1870-09-10	13	1
1870-09-11	6	0.99
1870-09-12	4	0.96
1870-09-13	27	0.91
1870-09-14	16	0.85
1870-09-15	19	0.78
1870-09-16	29	0.69
1870-09-17	25	0.6
1870-09-18	37	0.51
1870-09-19	27	0.41
1870-09-20	11	0.31
1870-09-21	42	0.22
1870-09-22	10	0.14
1870-09-23	16	0.07
1870-09-24	139	0.02
1870-09-25	173	0
1870-09-26	63	0.01
1870-09-27	45	0.05
1870-09-28	8	0.11
1870-09-29	17	0.19
1870-09-30	38	0.29
1870-10-01	31	0.4
1870-10-02	17	0.51
1870-10-03	11	0.62
1870-10-04	17	0.72
1870-10-05	22	0.81
1870-10-06	11	0.88
1870-10-07	8	0.94
1870-10-08	23	0.98
1870-10-09	12	1
1870-10-10	15	1
1870-10-11	15	0.98
1870-10-12	20	0.95
1870-10-13	6	0.9
1870-10-14	49	0.83
1870-10-15	21	0.76
1870-10-16	7	0.67
1870-10-17	4	0.58
1870-10-18	6	0.48
1870-10-19	16	0.38
1870-10-20	35	0.28
1870-10-21	21	0.18
1870-10-22	10	0.1
1870-10-23	8	0.04
1870-10-24	139	0.01
1870-10-25	189	0
1870-10-26	26	0.03
1870-10-27	15	0.08
1870-10-28	32	0.16
1870-10-29	11	0.25
1870-10-30	12	0.36
1870-10-31	7	0.47
1870-11-01	15	0.57
1870-11-02	11	0.67
1870-11-03	7	0.76
1870-11-04	7	0.84
1870-11-05	7	0.9
1870-11-06	14	0.95
1870-11-07	17	0.98
1870-11-08	65	1
1870-11-09	81	0.99
1870-11-10	13	0.97
1870-11-11	28	0.94
1870-11-12	18	0.88
1870-11-13	14	0.81
1870-11-14	21	0.73
1870-11-15	22	0.64
1870-11-16	17	0.54
1870-11-17	21	0.43
1870-11-18	30	0.33
1870-11-19	53	0.23
1870-11-20	30	0.14
1870-11-21	14	0.07
1870-11-22	23	0.02
1870-11-23	27	0
1870-11-24	19	0.01
1870-11-25	14	0.06
1870-11-26	6	0.12
1870-11-27	31	0.21
1870-11-28	14	0.3
1870-11-29	13	0.41
1870-11-30	7	0.51
1870-12-01	9	0.61
1870-12-02	7	0.7
1870-12-03	7	0.78
1870-12-04	8	0.86
1870-12-05	28	0.91
1870-12-06	14	0.96
1870-12-07	9	0.99
1870-12-08	19	1
1870-12-09	25	0.99
1870-12-10	40	0.97
1870-12-11	30	0.92
1870-12-12	12	0.86
1870-12-13	15	0.79
1870-12-14	28	0.7
1870-12-15	18	0.6
1870-12-16	63	0.49
1870-12-17	81	0.38
1870-12-18	31	0.27
1870-12-19	11	0.17
1870-12-20	6	0.09
1870-12-21	12	0.03
1870-12-22	33	0
1870-12-23	10	0
1870-12-24	9	0.03
1870-12-25	29	0.08
1870-12-26	15	0.16
1870-12-27	24	0.24
1870-12-28	7	0.34
1870-12-29	10	0.43
1870-12-30	5	0.53
1870-12-31	6	0.63
1871-01-01	10	0.71
1871-01-02	11	0.8
1871-01-03	33	0.87
1871-01-04	43	0.92
1871-01-05	30	0.97
1871-01-06	29	0.99
1871-01-07	34	1
1871-01-08	12	0.99
1871-01-09	18	0.95
1871-01-10	52	0.9
1871-01-11	9	0.83
1871-01-12	2	0.74
1871-01-13	59	0.64
1871-01-14	33	0.53
1871-01-15	10	0.42
1871-01-16	5	0.31
1871-01-17	3	0.21
1871-01-18	8	0.12
1871-01-19	13	0.06
1871-01-20	20	0.01
1871-01-21	14	0
1871-01-22	16	0.01
1871-01-23	8	0.05
1871-01-24	9	0.11
1871-01-25	10	0.18
1871-01-26	18	0.26
1871-01-27	9	0.35
1871-01-28	25	0.45
1871-01-29	25	0.54
1871-01-30	19	0.64
1871-01-31	14	0.72
1871-02-01	5	0.8
1871-02-02	7	0.87
1871-02-03	23	0.93
1871-02-04	62	0.97
1871-02-05	12	1
1871-02-06	8	1
1871-02-07	10	0.98
1871-02-08	20	0.93
1871-02-09	30	0.87
1871-02-10	15	0.78
1871-02-11	50	0.68
1871-02-12	158	0.57
1871-02-13	51	0.46
1871-02-14	19	0.35
1871-02-15	19	0.24
1871-02-16	21	0.15
1871-02-17	14	0.08
1871-02-18	5	0.03
1871-02-19	3	0
1871-02-20	2	0
1871-02-21	9	0.02
1871-02-22	15	0.07
1871-02-23	8	0.12
1871-02-24	23	0.2
1871-02-25	29	0.28
1871-02-26	38	0.37
1871-02-27	28	0.46
1871-02-28	10	0.55
1871-03-01	37	0.65
1871-03-02	22	0.74
1871-03-03	32	0.82
1871-03-04	5	0.89
1871-03-05	3	0.94
1871-03-06	4	0.98
1871-03-07	13	1
1871-03-08	24	0.99
1871-03-09	17	0.95
1871-03-10	25	0.89
1871-03-11	13	0.81
1871-03-12	3	0.72
1871-03-13	3	0.61
1871-03-14	4	0.49
1871-03-15	22	0.38
1871-03-16	32	0.28
1871-03-17	21	0.18
1871-03-18	30	0.11
1871-03-19	17	0.05
1871-03-20	30	0.02
1871-03-21	21	0
1871-03-22	23	0.01
1871-03-23	106	0.04
1871-03-24	25	0.08
1871-03-25	21	0.14
1871-03-26	7	0.21
1871-03-27	49	0.29
1871-03-28	20	0.38
1871-03-29	22	0.47
1871-03-30	7	0.57
1871-03-31	7	0.67
1871-04-01	55	0.76
1871-04-02	60	0.84
1871-04-03	16	0.91
1871-04-04	12	0.96
1871-04-05	11	0.99
1871-04-06	3	1
1871-04-07	14	0.97
1871-04-08	16	0.92
1871-04-09	69	0.84
1871-04-10	79	0.75
1871-04-11	29	0.64
1871-04-12	20	0.53
1871-04-13	26	0.42
1871-04-14	48	0.31
1871-04-15	28	0.22
1871-04-16	18	0.14
1871-04-17	39	0.08
1871-04-18	77	0.03
1871-04-19	14	0.01
1871-04-20	22	0
1871-04-21	15	0.01
1871-04-22	6	0.05
1871-04-23	58	0.09
1871-04-24	45	0.15
1871-04-25	7	0.23
1871-04-26	14	0.31
1871-04-27	13	0.4
1871-04-28	39	0.5
1871-04-29	60	0.6
1871-04-30	23	0.7
1871-05-01	14	0.8
1871-05-02	5	0.88
1871-05-03	5	0.94
1871-05-04	17	0.98
1871-05-05	11	1
1871-05-06	12	0.98
1871-05-07	6	0.94
1871-05-08	28	0.87
1871-05-09	26	0.78
1871-05-10	12	0.67
1871-05-11	34	0.57
1871-05-12	32	0.46
1871-05-13	23	0.35
1871-05-14	20	0.26
1871-05-15	14	0.18
1871-05-16	4	0.11
1871-05-17	9	0.06
1871-05-18	12	0.02
1871-05-19	27	0
1871-05-20	27	0
1871-05-21	24	0.02
1871-05-22	22	0.06
1871-05-23	22	0.11
1871-05-24	7	0.18
1871-05-25	29	0.26
1871-05-26	27	0.35
1871-05-27	24	0.45
1871-05-28	9	0.55
1871-05-29	13	0.65
1871-05-30	10	0.76
1871-05-31	13	0.85
1871-06-01	6	0.92
1871-06-02	3	0.97
1871-06-03	3	1
1871-06-04	4	0.99
1871-06-05	15	0.96
1871-06-06	23	0.89
1871-06-07	31	0.81
1871-06-08	34	0.71
1871-06-09	13	0.61
1871-06-10	10	0.5
1871-06-11	50	0.4
1871-06-12	6	0.31
1871-06-13	8	0.22
1871-06-14	6	0.15
1871-06-15	5	0.09
1871-06-16	9	0.04
1871-06-17	18	0.01
1871-06-18	88	0
1871-06-19	13	0.01
1871-06-20	10	0.03
1871-06-21	17	0.08
1871-06-22	28	0.14
1871-06-23	21	0.21
1871-06-24	15	0.3
1871-06-25	8	0.4
1871-06-26	29	0.51
1871-06-27	16	0.62
1871-06-28	14	0.72
1871-06-29	9	0.82
1871-06-30	4	0.9
1871-07-01	11	0.96
1871-07-02	15	1
1871-07-03	30	1
1871-07-04	52	0.97
1871-07-05	23	0.92
1871-07-06	18	0.84
1871-07-07	11	0.75
1871-07-08	10	0.66
1871-07-09	5	0.56
1871-07-10	6	0.46
1871-07-11	15	0.36
1871-07-12	7	0.27
1871-07-13	19	0.19
1871-07-14	26	0.12
1871-07-15	37	0.07
1871-07-16	17	0.03
1871-07-17	15	0.01
1871-07-18	7	0
1871-07-19	10	0.02
1871-07-20	9	0.05
1871-07-21	29	0.11
1871-07-22	83	0.18
1871-07-23	32	0.27
1871-07-24	29	0.37
1871-07-25	21	0.47
1871-07-26	13	0.59
1871-07-27	12	0.7
1871-07-28	32	0.8
1871-07-29	41	0.88
1871-07-30	17	0.95
1871-07-31	17	0.99
1871-08-01	12	1
1871-08-02	8	0.98
1871-08-03	3	0.94
1871-08-04	3	0.88
1871-08-05	24	0.8
1871-08-06	73	0.71
1871-08-07	9	0.62
1871-08-08	23	0.52
1871-08-09	16	0.42
1871-08-10	30	0.33
1871-08-11	30	0.25
1871-08-12	24	0.17
1871-08-13	19	0.1
1871-08-14	10	0.05
1871-08-15	8	0.02
1871-08-16	24	0
1871-08-17	20	0.01
1871-08-18	26	0.03
1871-08-19	10	0.08
1871-08-20	15	0.15
1871-08-21	53	0.24
1871-08-22	22	0.34
1871-08-23	51	0.45
1871-08-24	73	0.56
1871-08-25	67	0.67
1871-08-26	16	0.78
1871-08-27	16	0.86
1871-08-28	13	0.93
1871-08-29	11	0.98
1871-08-30	17	1
1871-08-31	8	0.99
1871-09-01	9	0.96
1871-09-02	9	0.91
1871-09-03	10	0.85
1871-09-04	21	0.77
1871-09-05	13	0.68
1871-09-06	20	0.59
1871-09-07	52	0.49
1871-09-08	37	0.4
1871-09-09	28	0.31
1871-09-10	12	0.22
1871-09-11	14	0.15
1871-09-12	17	0.09
1871-09-13	9	0.04
1871-09-14	9	0.01
1871-09-15	26	0
1871-09-16	28	0.02
1871-09-17	27	0.06
1871-09-18	22	0.12
1871-09-19	21	0.21
1871-09-20	15	0.31
1871-09-21	14	0.42
1871-09-22	14	0.53
1871-09-23	13	0.65
1871-09-24	6	0.75
1871-09-25	25	0.84
1871-09-26	11	0.91
1871-09-27	11	0.96
1871-09-28	4	0.99
1871-09-29	19	1
1871-09-30	16	0.98
1871-10-01	21	0.95
1871-10-02	20	0.89
1871-10-03	36	0.83
1871-10-04	27	0.75
1871-10-05	16	0.66
1871-10-06	16	0.57
1871-10-07	18	0.48
1871-10-08	13	0.38
1871-10-09	5	0.29
1871-10-10	14	0.2
1871-10-11	12	0.13
1871-10-12	27	0.07
1871-10-13	10	0.02
1871-10-14	35	0
1871-10-15	11	0.01
1871-10-16	19	0.04
1871-10-17	23	0.1
1871-10-18	22	0.18
1871-10-19	34	0.28
1871-10-20	21	0.39
1871-10-21	25	0.5
1871-10-22	10	0.61
1871-10-23	7	0.72
1871-10-24	36	0.81
1871-10-25	39	0.88
1871-10-26	14	0.94
1871-10-27	36	0.98
1871-10-28	9	1
1871-10-29	20	0.99
1871-10-30	8	0.97
1871-10-31	16	0.93
1871-11-01	20	0.88
1871-11-02	93	0.81
1871-11-03	49	0.73
1871-11-04	34	0.65
1871-11-05	15	0.55
1871-11-06	15	0.46
1871-11-07	6	0.36
1871-11-08	7	0.26
1871-11-09	63	0.18
1871-11-10	122	0.1
1871-11-11	42	0.04
1871-11-12	24	0.01
1871-11-13	15	0
1871-11-14	22	0.02
1871-11-15	18	0.08
1871-11-16	24	0.15
1871-11-17	18	0.24
1871-11-18	13	0.35
1871-11-19	53	0.46
1871-11-20	48	0.57
1871-11-21	21	0.67
1871-11-22	27	0.77
1871-11-23	17	0.85
1871-11-24	9	0.91
1871-11-25	9	0.96
1871-11-26	17	0.99
1871-11-27	16	1
1871-11-28	10	0.99
1871-11-29	11	0.97
1871-11-30	6	0.93
1871-12-01	4	0.87
1871-12-02	11	0.8
1871-12-03	11	0.72
1871-12-04	10	0.63
1871-12-05	11	0.53
1871-12-06	9	0.43
1871-12-07	14	0.33
1871-12-08	15	0.23
1871-12-09	24	0.14
1871-12-10	21	0.07
1871-12-11	16	0.02
1871-12-12	11	0
1871-12-13	18	0.01
1871-12-14	25	0.05
1871-12-15	13	0.12
1871-12-16	14	0.2
1871-12-17	35	0.3
1871-12-18	19	0.41
1871-12-19	21	0.52
1871-12-20	24	0.62
1871-12-21	14	0.71
1871-12-22	21	0.8
1871-12-23	4	0.87
1871-12-24	8	0.93
1871-12-25	20	0.97
1871-12-26	15	0.99
1871-12-27	9	1
1871-12-28	12	0.99
1871-12-29	13	0.96
1871-12-30	30	0.92
1871-12-31	16	0.86
1872-01-01	11	0.78
1872-01-02	5	0.69
1872-01-03	10	0.6
1872-01-04	4	0.49
1872-01-05	4	0.39
1872-01-06	10	0.28
1872-01-07	29	0.18
1872-01-08	4	0.1
1872-01-09	16	0.04
1872-01-10	7	0.01
1872-01-11	5	0
1872-01-12	17	0.03
1872-01-13	22	0.08
1872-01-14	25	0.16
1872-01-15	20	0.25
1872-01-16	12	0.35
1872-01-17	7	0.45
1872-01-18	25	0.55
1872-01-19	31	0.65
1872-01-20	28	0.74
1872-01-21	15	0.82
1872-01-22	12	0.88
1872-01-23	8	0.94
1872-01-24	13	0.97
1872-01-25	46	0.99
1872-01-26	25	1
1872-01-27	25	0.98
1872-01-28	18	0.95
1872-01-29	28	0.9
1872-01-30	13	0.83
1872-01-31	34	0.75
1872-02-01	41	0.65
1872-02-02	14	0.55
1872-02-03	12	0.44
1872-02-04	230	0.33
1872-02-05	54	0.22
1872-02-06	22	0.13
1872-02-07	16	0.06
1872-02-08	16	0.02
1872-02-09	10	0
1872-02-10	15	0.01
1872-02-11	9	0.05
1872-02-12	13	0.11
1872-02-13	10	0.19
1872-02-14	11	0.28
1872-02-15	22	0.38
1872-02-16	27	0.48
1872-02-17	25	0.57
1872-02-18	15	0.66
1872-02-19	23	0.75
1872-02-20	52	0.83
1872-02-21	9	0.89
1872-02-22	5	0.94
1872-02-23	17	0.98
1872-02-24	18	1
1872-02-25	27	1
1872-02-26	34	0.97
1872-02-27	42	0.93
1872-02-28	14	0.87
1872-02-29	12	0.79
1872-03-01	13	0.7
1872-03-02	78	0.59
1872-03-03	16	0.48
1872-03-04	7	0.37
1872-03-05	13	0.26
1872-03-06	15	0.16
1872-03-07	29	0.09
1872-03-08	16	0.03
1872-03-09	24	0.01
1872-03-10	17	0
1872-03-11	12	0.03
1872-03-12	19	0.08
1872-03-13	8	0.14
1872-03-14	19	0.22
1872-03-15	17	0.3
1872-03-16	30	0.4
1872-03-17	9	0.49
1872-03-18	7	0.59
1872-03-19	34	0.68
1872-03-20	40	0.76
1872-03-21	20	0.84
1872-03-22	36	0.9
1872-03-23	32	0.95
1872-03-24	24	0.99
1872-03-25	32	1
1872-03-26	33	0.99
1872-03-27	21	0.96
1872-03-28	29	0.9
1872-03-29	37	0.83
1872-03-30	14	0.73
1872-03-31	15	0.63
1872-04-01	5	0.51
1872-04-02	10	0.4
1872-04-03	23	0.29
1872-04-04	26	0.19
1872-04-05	8	0.11
1872-04-06	14	0.05
1872-04-07	14	0.01
1872-04-08	23	0
1872-04-09	4	0.01
1872-04-10	61	0.04
1872-04-11	68	0.09
1872-04-12	18	0.16
1872-04-13	9	0.24
1872-04-14	8	0.32
1872-04-15	67	0.41
1872-04-16	79	0.51
1872-04-17	34	0.6
1872-04-18	36	0.69
1872-04-19	45	0.78
1872-04-20	25	0.86
1872-04-21	20	0.92
1872-04-22	9	0.97
1872-04-23	10	0.99
1872-04-24	17	1
1872-04-25	8	0.97
1872-04-26	7	0.92
1872-04-27	6	0.85
1872-04-28	9	0.76
1872-04-29	34	0.65
1872-04-30	9	0.54
1872-05-01	30	0.43
1872-05-02	11	0.32
1872-05-03	22	0.22
1872-05-04	25	0.14
1872-05-05	11	0.07
1872-05-06	10	0.03
1872-05-07	23	0
1872-05-08	13	0
1872-05-09	30	0.02
1872-05-10	38	0.06
1872-05-11	16	0.11
1872-05-12	9	0.18
1872-05-13	15	0.26
1872-05-14	26	0.34
1872-05-15	25	0.44
1872-05-16	13	0.53
1872-05-17	20	0.63
1872-05-18	17	0.72
1872-05-19	7	0.81
1872-05-20	19	0.89
1872-05-21	7	0.95
1872-05-22	62	0.99
1872-05-23	42	1
1872-05-24	27	0.98
1872-05-25	28	0.94
1872-05-26	19	0.87
1872-05-27	22	0.78
1872-05-28	15	0.68
1872-05-29	16	0.57
1872-05-30	8	0.46
1872-05-31	11	0.35
1872-06-01	19	0.25
1872-06-02	19	0.16
1872-06-03	70	0.1
1872-06-04	10	0.04
1872-06-05	9	0.01
1872-06-06	16	0
1872-06-07	22	0.01
1872-06-08	8	0.03
1872-06-09	22	0.07
1872-06-10	48	0.13
1872-06-11	29	0.2
1872-06-12	7	0.28
1872-06-13	6	0.37
1872-06-14	17	0.47
1872-06-15	12	0.57
1872-06-16	21	0.67
1872-06-17	10	0.77
1872-06-18	8	0.85
1872-06-19	9	0.93
1872-06-20	4	0.98
1872-06-21	18	1
1872-06-22	35	0.99
1872-06-23	21	0.96
1872-06-24	13	0.89
1872-06-25	32	0.81
1872-06-26	14	0.71
1872-06-27	13	0.6
1872-06-28	5	0.49
1872-06-29	7	0.38
1872-06-30	6	0.29
1872-07-01	16	0.2
1872-07-02	30	0.13
1872-07-03	9	0.07
1872-07-04	11	0.03
1872-07-05	10	0.01
1872-07-06	17	0
1872-07-07	94	0.01
1872-07-08	126	0.05
1872-07-09	62	0.09
1872-07-10	28	0.16
1872-07-11	21	0.23
1872-07-12	8	0.32
1872-07-13	7	0.42
1872-07-14	13	0.52
1872-07-15	9	0.62
1872-07-16	21	0.73
1872-07-17	25	0.82
1872-07-18	19	0.9
1872-07-19	53	0.96
1872-07-20	14	0.99
1872-07-21	38	1
1872-07-22	4	0.97
1872-07-23	8	0.91
1872-07-24	6	0.83
1872-07-25	6	0.74
1872-07-26	3	0.64
1872-07-27	26	0.53
1872-07-28	34	0.43
1872-07-29	21	0.33
1872-07-30	20	0.24
1872-07-31	29	0.17
1872-08-01	21	0.1
1872-08-02	10	0.05
1872-08-03	95	0.02
1872-08-04	76	0
1872-08-05	28	0
1872-08-06	8	0.03
1872-08-07	6	0.06
1872-08-08	35	0.12
1872-08-09	54	0.19
1872-08-10	7	0.27
1872-08-11	9	0.37
1872-08-12	8	0.47
1872-08-13	10	0.58
1872-08-14	57	0.69
1872-08-15	90	0.79
1872-08-16	10	0.88
1872-08-17	9	0.95
1872-08-18	14	0.99
1872-08-19	9	1
1872-08-20	22	0.98
1872-08-21	14	0.93
1872-08-22	7	0.87
1872-08-23	7	0.78
1872-08-24	8	0.69
1872-08-25	53	0.59
1872-08-26	35	0.49
1872-08-27	25	0.39
1872-08-28	12	0.3
1872-08-29	10	0.22
1872-08-30	15	0.14
1872-08-31	21	0.08
1872-09-01	8	0.04
1872-09-02	40	0.01
1872-09-03	59	0
1872-09-04	28	0.01
1872-09-05	29	0.04
1872-09-06	33	0.09
1872-09-07	27	0.15
1872-09-08	13	0.23
1872-09-09	37	0.33
1872-09-10	12	0.44
1872-09-11	26	0.55
1872-09-12	10	0.66
1872-09-13	10	0.76
1872-09-14	3	0.86
1872-09-15	7	0.93
1872-09-16	10	0.98
1872-09-17	57	1
1872-09-18	27	0.99
1872-09-19	6	0.96
1872-09-20	15	0.9
1872-09-21	20	0.83
1872-09-22	9	0.74
1872-09-23	15	0.65
1872-09-24	9	0.55
1872-09-25	15	0.46
1872-09-26	10	0.37
1872-09-27	8	0.28
1872-09-28	18	0.2
1872-09-29	40	0.13
1872-09-30	20	0.07
1872-10-01	16	0.03
1872-10-02	37	0.01
1872-10-03	27	0
1872-10-04	28	0.02
1872-10-05	24	0.06
1872-10-06	56	0.12
1872-10-07	36	0.2
1872-10-08	23	0.3
1872-10-09	19	0.4
1872-10-10	15	0.52
1872-10-11	6	0.63
1872-10-12	8	0.74
1872-10-13	33	0.83
1872-10-14	68	0.91
1872-10-15	182	0.96
1872-10-16	87	0.99
1872-10-17	177	1
1872-10-18	156	0.98
1872-10-19	8	0.94
1872-10-20	7	0.88
1872-10-21	10	0.8
1872-10-22	12	0.72
1872-10-23	9	0.63
1872-10-24	13	0.54
1872-10-25	8	0.44
1872-10-26	5	0.35
1872-10-27	7	0.26
1872-10-28	30	0.18
1872-10-29	34	0.11
1872-10-30	33	0.06
1872-10-31	26	0.02
1872-11-01	29	0
1872-11-02	27	0.01
1872-11-03	36	0.04
1872-11-04	27	0.09
1872-11-05	19	0.17
1872-11-06	23	0.26
1872-11-07	36	0.37
1872-11-08	18	0.48
1872-11-09	18	0.6
1872-11-10	58	0.7
1872-11-11	78	0.8
1872-11-12	27	0.88
1872-11-13	38	0.94
1872-11-14	22	0.98
1872-11-15	26	1
1872-11-16	25	0.99
1872-11-17	9	0.97
1872-11-18	20	0.92
1872-11-19	13	0.86
1872-11-20	12	0.79
1872-11-21	11	0.71
1872-11-22	10	0.62
1872-11-23	7	0.52
1872-11-24	41	0.43
1872-11-25	24	0.33
1872-11-26	23	0.25
1872-11-27	29	0.16
1872-11-28	12	0.09
1872-11-29	16	0.04
1872-11-30	15	0.01
1872-12-01	8	0
1872-12-02	14	0.02
1872-12-03	20	0.07
1872-12-04	13	0.14
1872-12-05	9	0.23
1872-12-06	26	0.33
1872-12-07	20	0.45
1872-12-08	9	0.56
1872-12-09	32	0.67
1872-12-10	15	0.76
1872-12-11	6	0.85
1872-12-12	8	0.92
1872-12-13	13	0.96
1872-12-14	35	0.99
1872-12-15	22	1
1872-12-16	29	0.99
1872-12-17	49	0.96
1872-12-18	26	0.91
1872-12-19	8	0.85
1872-12-20	12	0.78
1872-12-21	34	0.7
1872-12-22	38	0.61
1872-12-23	30	0.51
1872-12-24	23	0.41
1872-12-25	22	0.31
1872-12-26	18	0.22
1872-12-27	16	0.14
1872-12-28	14	0.07
1872-12-29	17	0.02
1872-12-30	18	0
1872-12-31	32	0.01
1873-01-01	50	0.05
1873-01-02	12	0.11
1873-01-03	49	0.19
1873-01-04	41	0.29
1873-01-05	48	0.4
1873-01-06	53	0.51
1873-01-07	64	0.62
1873-01-08	56	0.72
1873-01-09	31	0.8
1873-01-10	11	0.88
1873-01-11	26	0.93
1873-01-12	34	0.97
1873-01-13	21	0.99
1873-01-14	22	1
1873-01-15	9	0.98
1873-01-16	12	0.95
1873-01-17	9	0.9
1873-01-18	16	0.84
1873-01-19	51	0.77
1873-01-20	31	0.68
1873-01-21	26	0.59
1873-01-22	12	0.49
1873-01-23	6	0.38
1873-01-24	28	0.28
1873-01-25	50	0.19
1873-01-26	38	0.11
1873-01-27	40	0.05
1873-01-28	24	0.01
1873-01-29	23	0
1873-01-30	15	0.03
1873-01-31	8	0.08
1873-02-01	12	0.16
1873-02-02	26	0.25
1873-02-03	15	0.35
1873-02-04	24	0.46
1873-02-05	28	0.56
1873-02-06	10	0.66
1873-02-07	27	0.75
1873-02-08	33	0.83
1873-02-09	59	0.89
1873-02-10	13	0.94
1873-02-11	29	0.98
1873-02-12	21	1
1873-02-13	14	1
1873-02-14	20	0.98
1873-02-15	10	0.94
1873-02-16	12	0.89
1873-02-17	7	0.82
1873-02-18	7	0.74
1873-02-19	23	0.65
1873-02-20	26	0.55
1873-02-21	33	0.45
1873-02-22	31	0.34
1873-02-23	29	0.24
1873-02-24	25	0.14
1873-02-25	18	0.07
1873-02-26	10	0.02
1873-02-27	16	0
1873-02-28	3	0.01
1873-03-01	13	0.05
1873-03-02	19	0.12
1873-03-03	14	0.2
1873-03-04	20	0.29
1873-03-05	28	0.39
1873-03-06	8	0.5
1873-03-07	14	0.59
1873-03-08	35	0.69
1873-03-09	149	0.77
1873-03-10	63	0.85
1873-03-11	22	0.91
1873-03-12	11	0.95
1873-03-13	19	0.98
1873-03-14	13	1
1873-03-15	14	0.99
1873-03-16	17	0.97
1873-03-17	33	0.93
1873-03-18	15	0.87
1873-03-19	4	0.79
1873-03-20	2	0.7
1873-03-21	18	0.6
1873-03-22	37	0.49
1873-03-23	35	0.38
1873-03-24	34	0.27
1873-03-25	25	0.18
1873-03-26	22	0.09
1873-03-27	24	0.04
1873-03-28	17	0.01
1873-03-29	11	0
1873-03-30	10	0.03
1873-03-31	2	0.08
1873-04-01	27	0.15
1873-04-02	52	0.24
1873-04-03	30	0.33
1873-04-04	19	0.43
1873-04-05	7	0.52
1873-04-06	19	0.62
1873-04-07	9	0.71
1873-04-08	9	0.79
1873-04-09	22	0.86
1873-04-10	17	0.92
1873-04-11	12	0.96
1873-04-12	19	0.99
1873-04-13	19	1
1873-04-14	14	0.99
1873-04-15	8	0.96
1873-04-16	5	0.9
1873-04-17	6	0.83
1873-04-18	42	0.74
1873-04-19	44	0.64
1873-04-20	37	0.53
1873-04-21	37	0.41
1873-04-22	31	0.3
1873-04-23	21	0.2
1873-04-24	10	0.12
1873-04-25	16	0.05
1873-04-26	17	0.01
1873-04-27	21	0
1873-04-28	17	0.01
1873-04-29	20	0.05
1873-04-30	17	0.11
1873-05-01	10	0.18
1873-05-02	16	0.27
1873-05-03	12	0.36
1873-05-04	4	0.45
1873-05-05	12	0.55
1873-05-06	18	0.64
1873-05-07	29	0.73
1873-05-08	22	0.81
1873-05-09	21	0.88
1873-05-10	24	0.94
1873-05-11	14	0.98
1873-05-12	4	1
1873-05-13	26	1
1873-05-14	23	0.97
1873-05-15	25	0.93
1873-05-16	68	0.86
1873-05-17	32	0.77
1873-05-18	18	0.67
1873-05-19	23	0.55
1873-05-20	26	0.44
1873-05-21	13	0.33
1873-05-22	20	0.22
1873-05-23	29	0.14
1873-05-24	53	0.07
1873-05-25	7	0.02
1873-05-26	8	0
1873-05-27	13	0
1873-05-28	12	0.03
1873-05-29	28	0.07
1873-05-30	24	0.13
1873-05-31	12	0.21
1873-06-01	42	0.29
1873-06-02	36	0.38
1873-06-03	38	0.48
1873-06-04	25	0.57
1873-06-05	25	0.66
1873-06-06	14	0.75
1873-06-07	10	0.83
1873-06-08	7	0.9
1873-06-09	7	0.96
1873-06-10	5	0.99
1873-06-11	11	1
1873-06-12	23	0.98
1873-06-13	16	0.94
1873-06-14	26	0.88
1873-06-15	27	0.79
1873-06-16	18	0.69
1873-06-17	17	0.58
1873-06-18	13	0.46
1873-06-19	43	0.35
1873-06-20	30	0.25
1873-06-21	23	0.16
[truncated: 51,723 more rows]
